# Supplementary material
Source: publisher site journal article supplement (https://www.dovepress.com/article/353762)
Supplement: Supplementary file 1 [file get_supplementary_file.php]

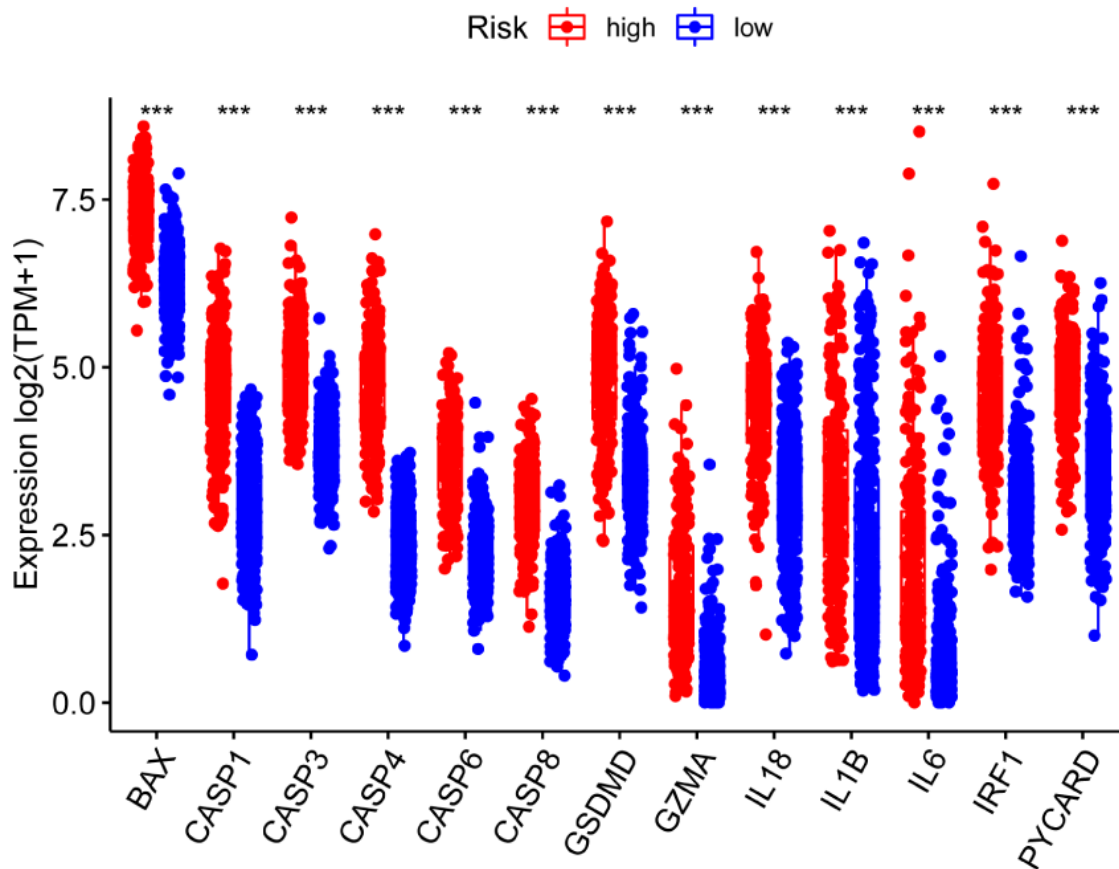

1

2 **Supplementary Figure 1 The expression level of pyroptosis-related genes in the two risk**  
 3 **populations.** The boxplot showed that patients with high-risk scores had a higher expression  
 4 levels of the pyroptosis genes (\*\*\*) represented  $p < 0.001$ ).

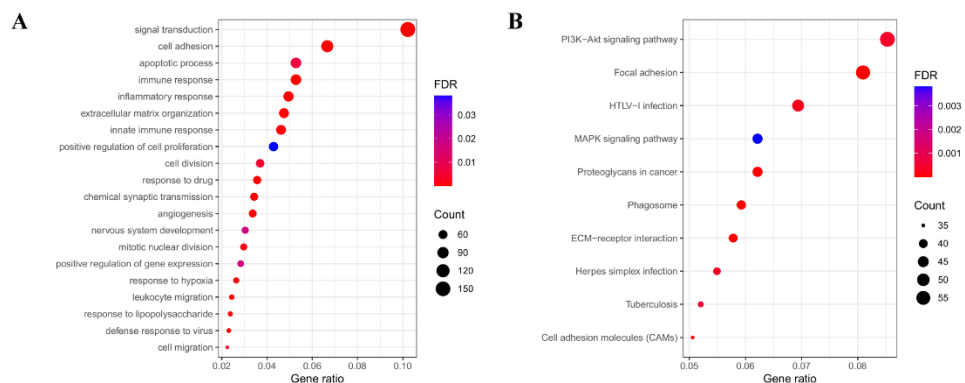

5

6 **Supplementary Figure 2 Functional analysis for DEGs between low and high-risk patients**  
7 **in the CGGA cohort. (A) BP enrichment for the differentially expressed gene set. (B) Pathway**  
8 **enrichment for differentially expressed genes.**

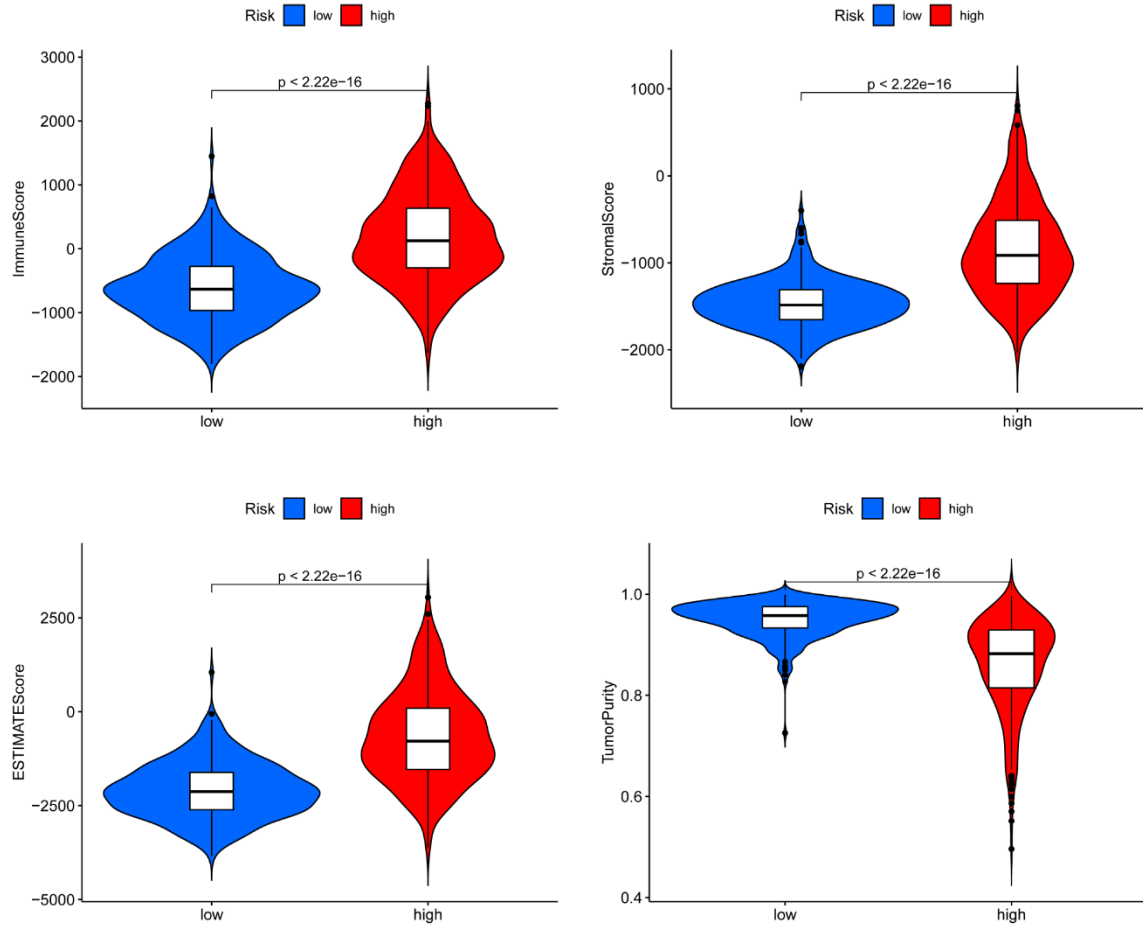

9

10 **Supplementary Figure 3 TME scores in different groups.** Scores of immune, stromal, estimate,  
11 and tumor purity were significantly different in low/high-risk groups.

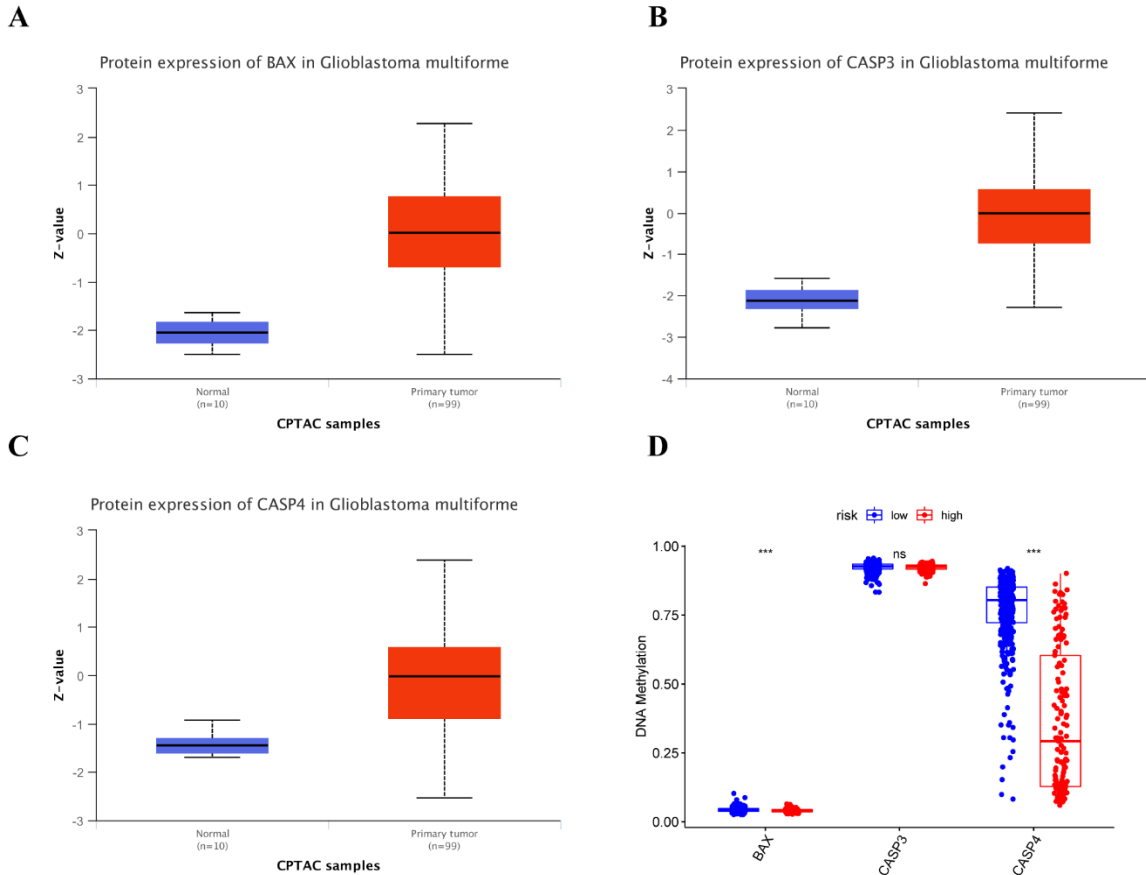

12

13 **Supplementary Figure 4 Protein expression in normal and glioblastoma and difference of**

14 **methylation between the low and high-risk groups. (A-C) Protein expression of the three risk**

15 **signature genes between normal and glioblastoma in the UALCAN database. (D) The difference of**

16 **methylation levels of BAX, CASP3, and CASP4 between the low and high-risk glioma patients in**

17 **the TCGA set (\*\*\*) represented  $p < 0.001$ .**

18 **Supplementary Table 1 The information of 57 pyroptosis-related genes.**

| Gene symbol | Full-names                        |
|-------------|-----------------------------------|
| AIM2        | Absent in melanoma 2              |
| APIP        | APAF1 interacting protein         |
| BAK1        | BCL2 antagonist/killer 1          |
| BAX         | BCL2 associated X                 |
| CASP1       | cysteine-aspartic acid protease-1 |
| CASP3       | cysteine-aspartic acid protease-3 |
| CASP4       | cysteine-aspartic acid protease-4 |
| CASP5       | cysteine-aspartic acid protease-5 |
| CASP6       | cysteine-aspartic acid protease-6 |

|             |                                                        |
|-------------|--------------------------------------------------------|
| CASP8       | cysteine-aspartic acid protease-8                      |
| CASP9       | cysteine-aspartic acid protease-9                      |
| CHMP2A      | charged multivesicular body protein 2A                 |
| CHMP2B      | charged multivesicular body protein 2B                 |
| CHMP3       | charged multivesicular body protein 3                  |
| CHMP4A      | charged multivesicular body protein 4A                 |
| CHMP4B      | charged multivesicular body protein 4B                 |
| CHMP4C      | charged multivesicular body protein 4C                 |
| CHMP6       | charged multivesicular body protein 6                  |
| CHMP7       | charged multivesicular body protein 7                  |
| CYCS        | cytochrome c, somatic                                  |
| DHX9        | DHX9 DExH-box helicase 9                               |
| ELANE       | elastase, neutrophil expressed                         |
| GPX4        | glutathione peroxidase 4                               |
| GSDMA       | gasdermin A                                            |
| GSDMB       | gasdermin B                                            |
| GSDMC       | gasdermin C                                            |
| GSDMD       | gasdermin D                                            |
| GSDME/DFNA5 | gasdermin E                                            |
| GZMA        | granzyme A                                             |
| GZMB        | granzyme B                                             |
| HMGB1       | high mobility group box 1                              |
| IL18        | interleukin 18                                         |
| IL1A        | interleukin 1A                                         |
| IL1B        | interleukin 1B                                         |
| IL6         | interleukin 6                                          |
| IRF1        | interferon regulatory factor 1                         |
| IRF2        | interferon regulatory factor 2                         |
| NAIP        | NLR family apoptosis inhibitory protein                |
| NLRC4       | NLR family CARD domain containing 4                    |
| NLRP1       | NLR family pyrin domain containing 1                   |
| NLRP2       | NLR family pyrin domain containing 2                   |
| NLRP3       | NLR family pyrin domain containing 3                   |
| NLRP6       | NLR family pyrin domain containing 6                   |
| NLRP7       | NLR family pyrin domain containing 7                   |
| NLRP9       | NLR family pyrin domain containing 9                   |
| NOD1        | nucleotide binding oligomerization domain containing 1 |
| NOD2        | nucleotide binding oligomerization domain containing 2 |
| PJVK        | pejvakin/deafness, autosomal recessive 59              |

|        |                                                       |
|--------|-------------------------------------------------------|
| PLCG1  | phospholipase C gamma 1                               |
| PRKACA | protein kinase cAMP-activated catalytic subunit alpha |
| PYCARD | PYD and CARD domain containing                        |
| SCAF11 | SR-related CTD associated factor 11                   |
| TIRAP  | TIR domain containing adaptor protein                 |
| TNF    | tumor necrosis factor                                 |
| TP53   | tumor protein p53                                     |
| TP63   | tumor protein p63                                     |
| ZBP1   | Z-DNA binding protein 1                               |

---
